# Supplementary material
Source: Springer Nature journal article supplement (https://www.springermedizin.de/resource/supplementary/12955_2012_1057_MOESM1_ESM.pdf/9559118)

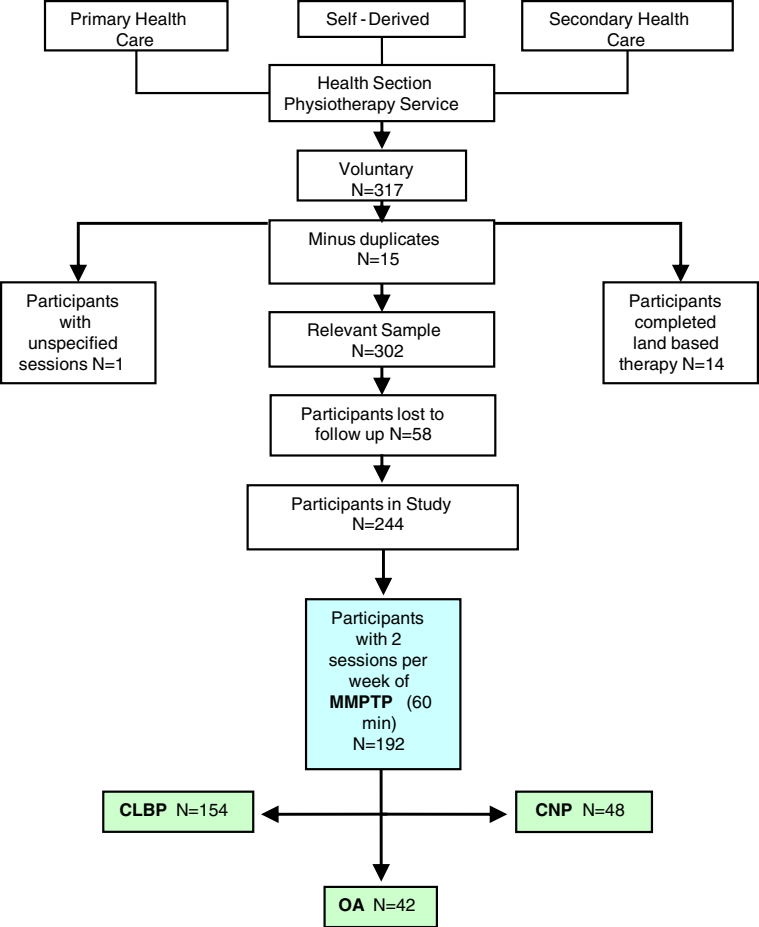

**MMPTP:** Multimodal Physical Therapy program.

**CLBP:** Low Back Pain.

**CNP:** Chronic neck pain.

Supplement: MOESM1 [file 9559118]
